# Supplementary material
Source: publisher site journal article supplement (https://www.dovepress.com/article/495246)
Supplement: Supplementary file 1 [file get_supplementary_file.php]

**Table S1. Summary of Radiomic Features Extracted and Selected**

| **Feature Type** | **Number of Features Extracted** | **Number of Features Selected (LASSO)** |
| --- | --- | --- |
| First-order Statistics | 180 | 1 |
| Gray Level Co-occurrence Matrix (GLCM) | 240 | 1 |
| Gray Level Run Length Matrix (GLRLM) | 180 | 1 |
| Gray Level Size Zone Matrix (GLSZM) | 180 | 1 |
| Gray Level Dependence Matrix (GLDM) | 132 | 0 |
| Shape Features | 0 | 0 |
| **Total** | **912** | **4** |

**Table S2. Radiomic Features Selected by LASSO Regression**

| Feature Name | Feature Type | Description | Clinical Relevance |
| --- | --- | --- | --- |
| wavelet.LHL_glcm_Idn | GLCM | Inverse difference normalized, capturing texture uniformity. | Indicates homogeneity within the tumor, potentially reflecting lower aggressiveness. |
| wavelet.LHL_gldm_DependenceVariance | GLDM | Measures variance in dependence among neighboring pixels. | Suggests tumor heterogeneity, associated with increased metastatic potential. |
| original_glszm_SizeZoneNonUniformity | GLSZM | Reflects the heterogeneity in zone size distribution. | Indicates irregular tumor structure, often linked to aggressive behavior. |
| wavelet.LHH_glrlm_GrayLevelNonUniformityNormalized | GLRLM | Normalized heterogeneity in gray levels within runs of pixels. | Captures intensity variations, potentially associated with tumor progression. |
